# Supplementary material
Source: PubMed Central journal article supplement (PMC7792214)
Supplement: 12874_2020_1196_MOESM1_ESM.pdf [file 12874_2020_1196_MOESM1_ESM.pdf]

| location      | date       | CFR        | total_cases_per_million | total_tests_per_thousan | positive_cases_per_test |
|---------------|------------|------------|-------------------------|-------------------------|-------------------------|
| Argentina     | 2020-04-18 | 0.04589917 | 58.811                  | 0.68                    | 0.086486765             |
| Australia     | 2020-04-18 | 0.01025563 | 256.197                 | 16.005                  | 0.01600731              |
| Austria       | 2020-04-18 | 0.02951448 | 1621.403                | 20.033                  | 0.080936605             |
| Bangladesh    | 2020-04-18 | 0.04080522 | 11.16                   | 0.126                   | 0.088571429             |
| Bahrain       | 2020-04-18 | 0.00401376 | 1024.928                | 48.633                  | 0.021074743             |
| Bolivia       | 2020-04-18 | 0.06288032 | 42.234                  | 0.312                   | 0.135365385             |
| Canada        | 2020-04-18 | 0.04107053 | 844.467                 | 13.728                  | 0.061514205             |
| Switzerland   | 2020-04-18 | 0.03918954 | 3119.375                | 24.958                  | 0.124984975             |
| Chile         | 2020-04-18 | 0.01253783 | 483.987                 | 5.895                   | 0.082101272             |
| Costa Rica    | 2020-04-18 | 0.00616333 | 127.402                 | 1.522                   | 0.083706965             |
| Czech Republi | 2020-04-18 | 0.02641625 | 611.543                 | 15.808                  | 0.038685665             |
| Denmark       | 2020-04-18 | 0.04750459 | 1221.124                | 15.774                  | 0.077413719             |
| Estonia       | 2020-04-18 | 0.02604524 | 1099.855                | 31.012                  | 0.035465465             |
| Finland       | 2020-04-18 | 0.02350244 | 629.702                 | 10.186                  | 0.061820342             |
| United Kingdo | 2020-04-18 | 0.13410371 | 1601.096                | 5.302                   | 0.30197963              |
| Ghana         | 2020-04-18 | 0.0124805  | 20.629                  | 1.982                   | 0.010408174             |
| Greece        | 2020-04-18 | 0.04757589 | 211.742                 | 4.8                     | 0.044112917             |
| Hungary       | 2020-04-18 | 0.09378408 | 189.848                 | 4.563                   | 0.041605961             |
| Indonesia     | 2020-04-18 | 0.08779335 | 21.654                  | 0.145                   | 0.149337931             |
| India         | 2020-04-18 | 0.03338434 | 10.419                  | 0.269                   | 0.038732342             |
| Israel        | 2020-04-18 | 0.01163149 | 1499.848                | 26.116                  | 0.057430234             |
| Italy         | 2020-04-18 | 0.13191714 | 2851.948                | 22.083                  | 0.129146764             |
| Japan         | 2020-04-18 | 0.01572231 | 77.445                  | 0.88                    | 0.088005682             |
| South Korea   | 2020-04-18 | 0.0217779  | 207.786                 | 10.772                  | 0.019289454             |
| Lithuania     | 2020-04-18 | 0.02663438 | 455.131                 | 20.619                  | 0.022073379             |
| Luxembourg    | 2020-04-18 | 0.02068966 | 5559.319                | 55.058                  | 0.100972048             |
| Latvia        | 2020-04-18 | 0.00733138 | 361.573                 | 18.329                  | 0.019726826             |
| Mexico        | 2020-04-18 | 0.07941818 | 53.322                  | 0.275                   | 0.193898182             |
| Malaysia      | 2020-04-18 | 0.01637783 | 162.238                 | 3.067                   | 0.052897946             |
| Norway        | 2020-04-18 | 0.02002651 | 1252.665                | 25.629                  | 0.048876858             |
| New Zealand   | 2020-04-18 | 0.01005484 | 226.866                 | 17.215                  | 0.013178391             |
| Pakistan      | 2020-04-18 | 0.01911509 | 33.867                  | 0.473                   | 0.071600423             |
| Panama        | 2020-04-18 | 0.02755344 | 975.719                 | 4.451                   | 0.219213435             |
| Peru          | 2020-04-18 | 0.02224034 | 409.107                 | 4.079                   | 0.100295906             |
| Philippines   | 2020-04-18 | 0.06583872 | 53.641                  | 0.481                   | 0.111519751             |
| Portugal      | 2020-04-18 | 0.03453895 | 1865.504                | 15.418                  | 0.1209952               |
| Paraguay      | 2020-04-18 | 0.03960396 | 28.321                  | 0.741                   | 0.038219973             |
| Romania       | 2020-04-18 | 0.04958473 | 419.333                 | 4.693                   | 0.089352866             |
| Russia        | 2020-04-18 | 0.00852912 | 219.331                 | 12.74                   | 0.017215934             |
| Senegal       | 2020-04-18 | 0.00877193 | 20.425                  | 0.269                   | 0.075929368             |
| Serbia        | 2020-04-18 | 0.01933216 | 836.2                   | 4.139                   | 0.202029476             |
| Slovakia      | 2020-04-18 | 0.0085796  | 192.137                 | 8.122                   | 0.023656365             |
| Slovenia      | 2020-04-18 | 0.0506135  | 627.245                 | 19.819                  | 0.03164867              |
| Turkey        | 2020-04-18 | 0.02252183 | 931.312                 | 7.144                   | 0.130362822             |
| Taiwan        | 2020-04-18 | 0.01518987 | 16.585                  | 2.225                   | 0.007453933             |
| Uruguay       | 2020-04-18 | 0.01578947 | 164.089                 | 2.197                   | 0.074687756             |

|               |            |            |          |        |             |
|---------------|------------|------------|----------|--------|-------------|
| United States | 2020-04-18 | 0.05277115 | 2121.324 | 11.159 | 0.19009983  |
| South Africa  | 2020-04-18 | 0.01796622 | 46.924   | 1.843  | 0.025460662 |
