# Supplementary material
Source: PubMed Central journal article supplement (PMC7792214)

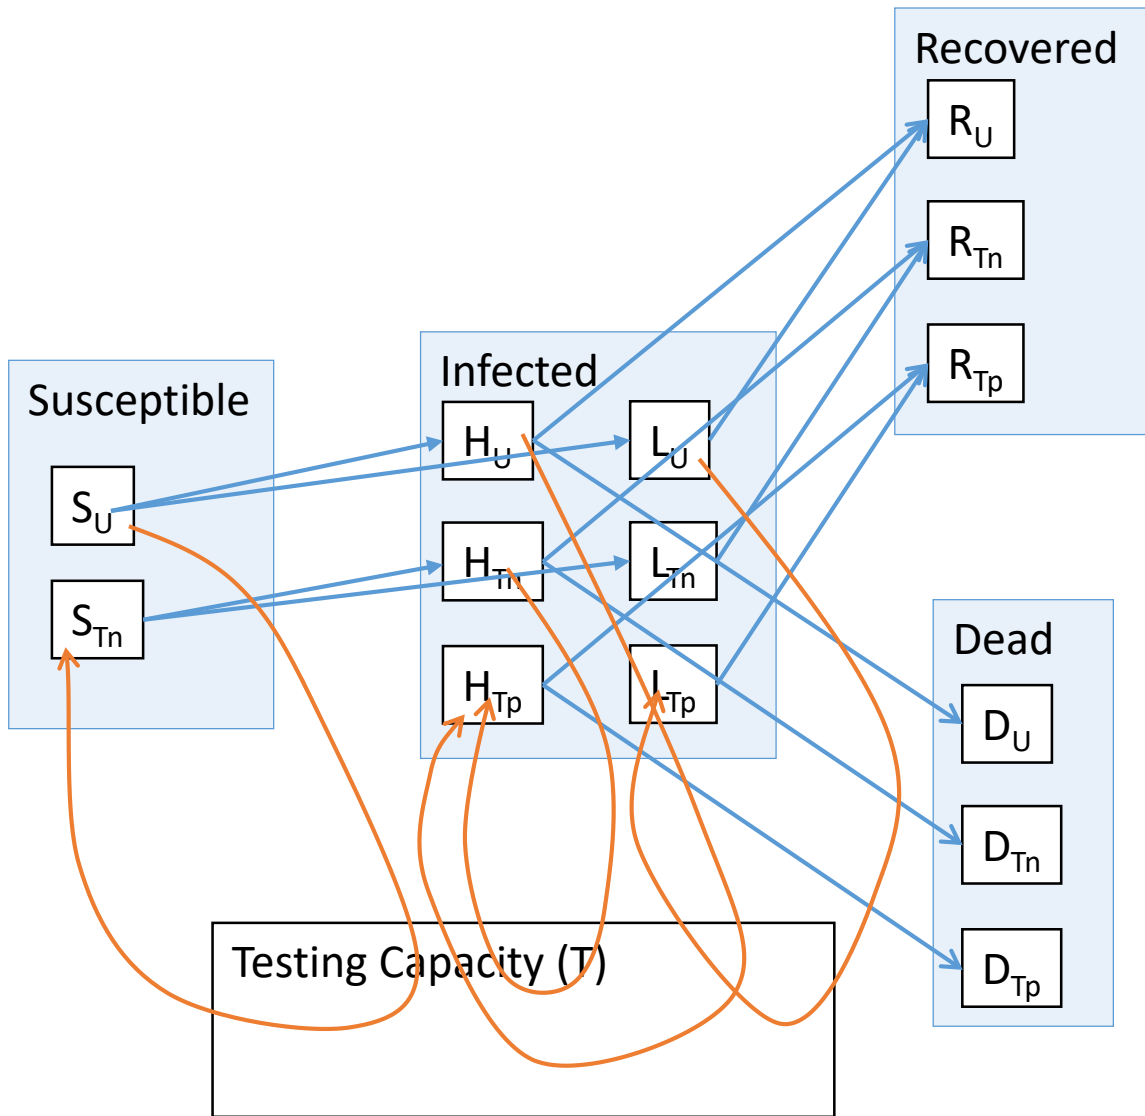

Supplement: 12874_2020_1196_MOESM2_ESM.pdf [file 12874_2020_1196_MOESM2_ESM.pdf]
